# Supplementary material
Source: HighWire-hosted journal article supplement (https://bmjopen.bmj.com/content/12/1/e057724)
Supplement: inline-supplementary-material-1 [file inline-supplementary-material-1.pdf]

## Nonoperative treatment for lumbar spinal stenosis – 22 July 2020 update

Database: Ovid MEDLINE: Epub Ahead of Print, In-Process & Other Non-Indexed Citations, Ovid MEDLINE® Daily and Ovid MEDLINE® <1946-Present>

Search Strategy:

- 
- 1 randomized controlled trial.pt. (509927)
  - 2 controlled clinical trial.pt. (93770)
  - 3 Pragmatic clinical trial.pt. (1444)
  - 4 random\*.ti,ab. (1145458)
  - 5 placebo.ab,ti. (215288)
  - 6 drug therapy.fs. (2221199)
  - 7 trial.ab,ti. (599425)
  - 8 groups.ab,ti. (2097678)
  - 9 1 or 2 or 3 or 4 or 5 or 6 or 7 or 8 (5031369)
  - 10 (animals not (humans and animals)).sh. (4686362)
  - 11 9 not 10 (4375594)
  - 12 exp Constriction, Pathologic/ (30449)
  - 13 limit 12 to yr="1976 - 1982" (1906)
  - 14 exp Lumbar Vertebrae/ (52505)
  - 15 limit 14 to yr="1966 - 1982" (4472)
  - 16 exp Spinal Canal/ (7519)
  - 17 limit 16 to yr="1966 - 1982" (1172)
  - 18 exp Spinal Diseases/ (123399)
  - 19 limit 18 to yr="1966 - 1982" (18365)
  - 20 exp Spinal Stenosis/ (6116)
  - 21 spinal stenosis.ti,ab. (5088)
  - 22 (lumbar adj5 stenosis).ti,ab. (4268)
  - 23 (spin\* adj5 stenosis).ti,ab. (6620)
  - 24 neurogenic claudication.ti,ab. (633)
  - 25 exp Spinal Osteophytosis/ (4018)
  - 26 exp Spondylosis/ (7484)
  - 27 (lumb\* adj5 spondyl\*).ti,ab. (2886)
  - 28 exp Cauda Equina/ (3250)
  - 29 lumbar radicular pain.ti,ab. (218)
  - 30 13 or 15 or 17 or 19 or 20 or 21 or 22 or 23 or 24 or 25 or 26 or 27 or 28 or 29 (44520)
  - 31 9 and 30 (6508)
  - 32 limit 31 to ed=20190920-20200731 (275)
  - 33 limit 31 to yr=2019-2020 (545)
  - 34 32 or 33 (583)

Database: Embase Classic+Embase <1947 to 2020 July 21>

Search Strategy:

- 
- 1 Randomized Controlled Trial/ (613507)
  - 2 exp Controlled clinical trial/ (800817)
  - 3 Controlled Study/ (7533843)
  - 4 Double Blind Procedure/ (176652)

- 5 Single Blind Procedure/ (39549)
- 6 crossover procedure/ (64054)
- 7 placebo/ (362923)
- 8 Randomization/ (87513)
- 9 random\*.ti,ab. (1563918)
- 10 placebo?.ti,ab. (314621)
- 11 allocat\*.ti,ab. (155448)
- 12 assign\*.ti,ab. (400691)
- 13 blind\*.ti,ab. (436413)
- 14 (cross-over or crossover).ti,ab. (107060)
- 15 (compare or compared or comparing or comparison or comparative).ti,ab. (6802913)
- 16 (controlled adj7 (study or design or trial)).ti,ab. (355549)
- 17 ((singl\* or doubl\* or trebl\* or tripl\*) adj7 (blind\* or mask\*)).ti,ab. (250201)
- 18 trial.ti,ab. (878032)
- 19 1 or 2 or 3 or 4 or 5 or 6 or 7 or 8 or 9 or 10 or 11 or 12 or 13 or 14 or 15 or 16 or 17 or 18 (12682849)
- 20 exp animals/ or exp invertebrate/ or animal experiment/ or animal model/ or animal tissue/ or animal cell/ or nonhuman/ (29761121)
- 21 human/ or normal human/ or human cell/ (22533987)
- 22 20 and 21 (22470134)
- 23 20 not 22 (7290987)
- 24 19 not 23 (9386132)
- 25 exp vertebral canal stenosis/ (12543)
- 26 (spin\* adj5 stenosis).ti,ab. (9011)
- 27 (lumbar adj5 stenosis).ti,ab. (5728)
- 28 (neurogenic adj2 claudication).ti,ab. (1047)
- 29 (Spin\* adj2 Osteophytosis).ti,ab. (26)
- 30 exp cauda equina/ (4498)
- 31 lumbar radicular pain.ti,ab. (316)
- 32 (lumb\* adj5 spondyl\*).ti,ab. (4037)
- 33 exp spondylosis/ (9560)
- 34 spondylolisthesis/ (9419)
- 35 25 or 26 or 27 or 28 or 29 or 30 or 31 or 32 or 33 or 34 (36443)
- 36 24 and 35 (11296)
- 37 limit 36 to yr=2019-2020 (1405)
- 38 limit 36 to dd=20190920-20200731 (282)
- 39 37 or 38 (1426)

## CENTRAL via CRS Web

- 1 MESH DESCRIPTOR Spinal Stenosis EXPLODE ALL AND CENTRAL:TARGET 423
- 2 (spin\* NEAR5 stenosis) AND CENTRAL:TARGET 1189
- 3 lumb\* NEAR5 stenosis AND CENTRAL:TARGET 871
- 4 neurogenic claudication AND CENTRAL:TARGET 168
- 5 MESH DESCRIPTOR Spinal Osteophytosis EXPLODE ALL AND CENTRAL:TARGET 86
- 6 MESH DESCRIPTOR Spondylosis EXPLODE ALL AND CENTRAL:TARGET 374
- 7 lumb\* NEAR5 spondyl\* AND CENTRAL:TARGET 400
- 8 MESH DESCRIPTOR Cauda Equina EXPLODE ALL AND CENTRAL:TARGET 15
- 9 lumbar radicular pain AND CENTRAL:TARGET 93

10 #1 OR #2 OR #3 OR #4 OR #5 OR #6 OR #7 OR #8 OR #9 AND CENTRAL:TARGET 1932  
11 2019:YR AND CENTRAL:TARGET 105034  
12 2020:YR AND CENTRAL:TARGET 30634  
13 #11 OR #12 135668  
14 #13 AND #10 209

## CINAHL

S43 S41 OR S42 Search modes - Boolean/Phrase Interface - EBSCOhost Research Databases  
Search Screen - Advanced Search  
Database - CINAHL Plus with Full Text 242  
S42 S40 AND EM 20190919-20200731 Search modes - Boolean/Phrase Interface - EBSCOhost  
Research Databases  
Search Screen - Advanced Search  
Database - CINAHL Plus with Full Text 192  
S41 S40 Limiters - Published Date: 20190901-20200731  
Search modes - Boolean/Phrase Interface - EBSCOhost Research Databases  
Search Screen - Advanced Search  
Database - CINAHL Plus with Full Text 161  
S40 S28 AND S39 Search modes - Boolean/Phrase Interface - EBSCOhost Research Databases  
Search Screen - Advanced Search  
Database - CINAHL Plus with Full Text 3,036  
S39 S29 OR S30 OR S31 OR S32 OR S33 OR S34 OR S35 OR S36 OR S37 OR S38 Search modes -  
Boolean/Phrase Interface - EBSCOhost Research Databases  
Search Screen - Advanced Search  
Database - CINAHL Plus with Full Text 6,262  
S38 lumb\* W5 spondyl\* Search modes - Boolean/Phrase Interface - EBSCOhost Research  
Databases  
Search Screen - Advanced Search  
Database - CINAHL Plus with Full Text 796  
S37 MH "Spondylolysis" Search modes - Boolean/Phrase Interface - EBSCOhost Research  
Databases  
Search Screen - Advanced Search  
Database - CINAHL Plus with Full Text 486  
S36 MH "Spondylolisthesis" Search modes - Boolean/Phrase Interface - EBSCOhost Research  
Databases  
Search Screen - Advanced Search  
Database - CINAHL Plus with Full Text 1,438  
S35 "lumbar radicular pain" Search modes - Boolean/Phrase Interface - EBSCOhost Research  
Databases  
Search Screen - Advanced Search  
Database - CINAHL Plus with Full Text 125  
S34 MH "Cauda Equina" Search modes - Boolean/Phrase Interface - EBSCOhost Research  
Databases  
Search Screen - Advanced Search  
Database - CINAHL Plus with Full Text 368  
S33 MH "Spinal Osteophytosis" Search modes - Boolean/Phrase Interface - EBSCOhost Research  
Databases  
Search Screen - Advanced Search

Database - CINAHL Plus with Full Text 310  
S32 "neurogenic claudication" Search modes - Boolean/Phrase Interface - EBSCOhost Research Databases  
Search Screen - Advanced Search  
Database - CINAHL Plus with Full Text 243  
S31 lumb\* W5 stenosis Search modes - Boolean/Phrase Interface - EBSCOhost Research Databases  
Search Screen - Advanced Search  
Database - CINAHL Plus with Full Text 1,768  
S30 spin\* W5 stenosis Search modes - Boolean/Phrase Interface - EBSCOhost Research Databases  
Search Screen - Advanced Search  
Database - CINAHL Plus with Full Text 3,656  
S29 MH "Spinal Stenosis" Search modes - Boolean/Phrase Interface - EBSCOhost Research Databases  
Search Screen - Advanced Search  
Database - CINAHL Plus with Full Text 2,741  
S28 S26 NOT S27 Search modes - Boolean/Phrase Interface - EBSCOhost Research Databases  
Search Screen - Advanced Search  
Database - CINAHL Plus with Full Text 2,433,818  
S27 MH "Animals" Search modes - Boolean/Phrase Interface - EBSCOhost Research Databases  
Search Screen - Advanced Search  
Database - CINAHL Plus with Full Text 87,894  
S26 S7 OR S12 OR S19 OR S25 Search modes - Boolean/Phrase Interface - EBSCOhost Research Databases  
Search Screen - Advanced Search  
Database - CINAHL Plus with Full Text 2,461,016  
S25 S20 OR S21 OR S22 OR S23 OR S24 Search modes - Boolean/Phrase Interface - EBSCOhost Research Databases  
Search Screen - Advanced Search  
Database - CINAHL Plus with Full Text 1,686,740  
S24 volunteer\* Search modes - Boolean/Phrase Interface - EBSCOhost Research Databases  
Search Screen - Advanced Search  
Database - CINAHL Plus with Full Text 52,797  
S23 prospectiv\* Search modes - Boolean/Phrase Interface - EBSCOhost Research Databases  
Search Screen - Advanced Search  
Database - CINAHL Plus with Full Text 525,699  
S22 control\* Search modes - Boolean/Phrase Interface - EBSCOhost Research Databases  
Search Screen - Advanced Search  
Database - CINAHL Plus with Full Text 1,275,002  
S21 followup stud\* Search modes - Boolean/Phrase Interface - EBSCOhost Research Databases  
Search Screen - Advanced Search  
Database - CINAHL Plus with Full Text 203  
S20 follow-up stud\* Search modes - Boolean/Phrase Interface - EBSCOhost Research Databases  
Search Screen - Advanced Search  
Database - CINAHL Plus with Full Text 12,011  
S19 S13 OR S14 OR S15 OR S16 OR S17 OR S18 Search modes - Boolean/Phrase Interface - EBSCOhost Research Databases

Search Screen - Advanced Search  
Database - CINAHL Plus with Full Text 1,539,358  
S18 MH "Prospective Studies+" Search modes - Boolean/Phrase Interface - EBSCOhost Research Databases

Search Screen - Advanced Search  
Database - CINAHL Plus with Full Text 444,171  
S17 MH "Evaluation Research+" Search modes - Boolean/Phrase Interface - EBSCOhost Research Databases

Search Screen - Advanced Search  
Database - CINAHL Plus with Full Text 248,871  
S16 MH "Comparative Studies" Search modes - Boolean/Phrase Interface - EBSCOhost Research Databases

Search Screen - Advanced Search  
Database - CINAHL Plus with Full Text 331,705  
S15 latin square Search modes - Boolean/Phrase Interface - EBSCOhost Research Databases

Search Screen - Advanced Search  
Database - CINAHL Plus with Full Text 248  
S14 MH "Study Design+" Search modes - Boolean/Phrase Interface - EBSCOhost Research Databases

Search Screen - Advanced Search  
Database - CINAHL Plus with Full Text 1,351,924  
S13 MH "Random Sample" Search modes - Boolean/Phrase Interface - EBSCOhost Research Databases

Search Screen - Advanced Search  
Database - CINAHL Plus with Full Text 34,389  
S12 S8 OR S9 OR S10 OR S11 Search modes - Boolean/Phrase Interface - EBSCOhost Research Databases

Search Screen - Advanced Search  
Database - CINAHL Plus with Full Text 431,064  
S11 random\* Search modes - Boolean/Phrase Interface - EBSCOhost Research Databases

Search Screen - Advanced Search  
Database - CINAHL Plus with Full Text 414,911  
S10 placebo\* Search modes - Boolean/Phrase Interface - EBSCOhost Research Databases

Search Screen - Advanced Search  
Database - CINAHL Plus with Full Text 66,332  
S9 MH "Placebos" Search modes - Boolean/Phrase Interface - EBSCOhost Research Databases

Search Screen - Advanced Search  
Database - CINAHL Plus with Full Text 12,827  
S8 MH "Placebo Effect" Search modes - Boolean/Phrase Interface - EBSCOhost Research Databases

Search Screen - Advanced Search  
Database - CINAHL Plus with Full Text 2,282  
S7 S1 OR S2 OR S3 OR S4 OR S5 OR S6 Search modes - Boolean/Phrase Interface - EBSCOhost Research Databases

Search Screen - Advanced Search  
Database - CINAHL Plus with Full Text 404,557  
S6 triple-blind Search modes - Boolean/Phrase Interface - EBSCOhost Research Databases

Search Screen - Advanced Search

Database - CINAHL Plus with Full Text 379  
 S5 single blind Search modes - Boolean/Phrase Interface - EBSCOhost Research Databases  
 Search Screen - Advanced Search  
 Database - CINAHL Plus with Full Text 15,679  
 S4 double blind Search modes - Boolean/Phrase Interface - EBSCOhost Research Databases  
 Search Screen - Advanced Search  
 Database - CINAHL Plus with Full Text 58,644  
 S3 clinical W3 trial Search modes - Boolean/Phrase Interface - EBSCOhost Research Databases  
 Search Screen - Advanced Search  
 Database - CINAHL Plus with Full Text 250,481  
 S2 "randomi?ed controlled trial\*" Search modes - Boolean/Phrase Interface - EBSCOhost Research  
 Databases  
 Search Screen - Advanced Search  
 Database - CINAHL Plus with Full Text 169,418  
 S1 MH "Clinical Trials+" Search modes - Boolean/Phrase Interface - EBSCOhost Research  
 Databases  
 Search Screen - Advanced Search  
 Database - CINAHL Plus with Full Text 303,246

PEDro

Yield: 12

Abstract and title: stenosis

AND

Body part: lumbar spine, sacroiliac joint or pelvis

AND

Method: clinical trial

Year: Since 2012

ICL

|                     |                                                                                                                                                                                                                                                                                                                                                                                                                                           |      |                     |
|---------------------|-------------------------------------------------------------------------------------------------------------------------------------------------------------------------------------------------------------------------------------------------------------------------------------------------------------------------------------------------------------------------------------------------------------------------------------------|------|---------------------|
| S1                  | , Peer Review only, Publication Type: Clinical Trial                                                                                                                                                                                                                                                                                                                                                                                      | 85   | 2020-07-22 10:21:40 |
| S2                  | , Peer Review only, Publication Type: Controlled Clinical Trial                                                                                                                                                                                                                                                                                                                                                                           | 9    | 2020-07-22          |
| 10:21:48            |                                                                                                                                                                                                                                                                                                                                                                                                                                           |      |                     |
| S3                  | , Peer Review only, Publication Type: Randomized Controlled Trial                                                                                                                                                                                                                                                                                                                                                                         | 288  | 2020-               |
| 07-22 10:22:09      |                                                                                                                                                                                                                                                                                                                                                                                                                                           |      |                     |
| S4                  | All Fields: random* OR All Fields: placebo* OR All Fields: sham, Peer Review only                                                                                                                                                                                                                                                                                                                                                         | 1029 |                     |
| 2020-07-22 10:28:19 |                                                                                                                                                                                                                                                                                                                                                                                                                                           |      |                     |
| S5                  | All Fields: "clinical trial" OR All Fields: "controlled trial", Peer Review only                                                                                                                                                                                                                                                                                                                                                          | 481  |                     |
| 2020-07-22 10:28:38 |                                                                                                                                                                                                                                                                                                                                                                                                                                           |      |                     |
| S6                  | All Fields: versus OR All Fields: vs., Peer Review only                                                                                                                                                                                                                                                                                                                                                                                   | 196  | 2020-07-22 10:28:57 |
| S7                  | All Fields: double-blind OR All Fields: "double-blind", Peer Review only                                                                                                                                                                                                                                                                                                                                                                  | 107  | 2020-               |
| 07-22 10:29:22      |                                                                                                                                                                                                                                                                                                                                                                                                                                           |      |                     |
| S8                  | All Fields: single-blind OR All Fields: "single-blind", Peer Review only                                                                                                                                                                                                                                                                                                                                                                  | 456  | 2020-               |
| 07-22 10:29:33      |                                                                                                                                                                                                                                                                                                                                                                                                                                           |      |                     |
| S9                  | , Peer Review only, Publication Type: Clinical Trial OR , Peer Review only, Publication<br>Type: Controlled Clinical Trial OR , Peer Review only, Publication Type: Randomized Controlled Trial OR All<br>Fields: random* OR All Fields: placebo* OR All Fields: sham, Peer Review only OR All Fields: "clinical trial"<br>OR All Fields: "controlled trial", Peer Review only OR All Fields: versus OR All Fields: vs., Peer Review only |      |                     |

OR All Fields:double-blind OR All Fields:"double-blind", Peer Review only OR All Fields:single-blind OR All Fields:"single-blind", Peer Review only 1584 2020-07-22 10:29:49

S10 Subject:"spinal stenosis" OR All Fields:"spinal stenosis", Peer Review only 83 2020-07-22 10:30:56

S11 Subject:"Spinal Osteophytosis" OR Subject:"Spondylosis" OR Subject:"Spondylolisthesis", Peer Review only 83 2020-07-22 10:31:27

S12 Subject:"Cauda equina" OR All Fields:"lumbar radicular pain", Peer Review only 14 2020-07-22 10:32:34

S13 Subject:"spinal stenosis" OR All Fields:"spinal stenosis", Peer Review only OR Subject:"Spinal Osteophytosis" OR Subject:"Spondylosis" OR Subject:"Spondylolisthesis", Peer Review only OR Subject:"Cauda equina" OR All Fields:"lumbar radicular pain", Peer Review only 172 2020-07-22 10:32:47

S14 , Peer Review only, Publication Type:Clinical Trial OR , Peer Review only, Publication Type:Controlled Clinical Trial OR , Peer Review only, Publication Type:Randomized Controlled Trial OR All Fields:random\* OR All Fields:placebo\* OR All Fields:sham, Peer Review only OR All Fields:"clinical trial" OR All Fields:"controlled trial", Peer Review only OR All Fields:versus OR All Fields:vs., Peer Review only OR All Fields:double-blind OR All Fields:"double-blind", Peer Review only OR All Fields:single-blind OR All Fields:"single-blind", Peer Review only AND Subject:"spinal stenosis" OR All Fields:"spinal stenosis", Peer Review only OR Subject:"Spinal Osteophytosis" OR Subject:"Spondylosis" OR Subject:"Spondylolisthesis", Peer Review only OR Subject:"Cauda equina" OR All Fields:"lumbar radicular pain", Peer Review only 26 2020-07-22 10:32:57

S15 , Year: from 2019 to 2020, Peer Review only 325 2020-07-22 10:33:21

S16 , Peer Review only, Publication Type:Clinical Trial OR , Peer Review only, Publication Type:Controlled Clinical Trial OR , Peer Review only, Publication Type:Randomized Controlled Trial OR All Fields:random\* OR All Fields:placebo\* OR All Fields:sham, Peer Review only OR All Fields:"clinical trial" OR All Fields:"controlled trial", Peer Review only OR All Fields:versus OR All Fields:vs., Peer Review only OR All Fields:double-blind OR All Fields:"double-blind", Peer Review only OR All Fields:single-blind OR All Fields:"single-blind", Peer Review only AND Subject:"spinal stenosis" OR All Fields:"spinal stenosis", Peer Review only OR Subject:"Spinal Osteophytosis" OR Subject:"Spondylosis" OR Subject:"Spondylolisthesis", Peer Review only OR Subject:"Cauda equina" OR All Fields:"lumbar radicular pain", Peer Review only AND , Year: from 2019 to 2020, Peer Review only
